# Supplementary material for: Evaluation of Theoretical Frameworks to Detect Correlates of HPV Vaccination in the Midwest, US, Using Structural Equation Modeling
Source: MDPI journal article supplement (doi:10.3390/vaccines11121856), 2023-12-15
Supplement: s1 [file s1]

Table S1. Covariances among residual terms related constructs and items within a construct for the IHT, HBT and TPB derived measurement models.

| IHT derived measurement model                                                                                                                                                                                                                                                                                                                                 | Theory of Planned Behavior and Health Belief Theory derived measurement model                                                                                                                                                                                                                                                                                                 |
|---------------------------------------------------------------------------------------------------------------------------------------------------------------------------------------------------------------------------------------------------------------------------------------------------------------------------------------------------------------|-------------------------------------------------------------------------------------------------------------------------------------------------------------------------------------------------------------------------------------------------------------------------------------------------------------------------------------------------------------------------------|
| (L1 WITH L2; L1 WITH L3; L1 WITH L4; L3 WITH L4; L3 WITH L5; L3 WITH L6; L4 WITH L6; L5 WITH L6; L6 WITH L7) (L1A WITH L1B; L1A WITH L1C; L1A WITH L1D; L1B WITH L1D; L1B WITH L1C; L1D WITH L1E; L1G WITH L1H; L3C WITH L3D; L3A WITH L3C; L4A WITH L4B; L5A WITH L5C; L5A WITH L5D; L5B WITH L5C; L5B WITH L5D; L7A WITH L7B; L7A WITH L7C; L7D WITH L7E;). | (L1 WITH L2; L1 WITH L3; L1 WITH L4; L3 WITH L4; L3 WITH L5; L4 WITH L5; L5 WITH L6) (L1A WITH L1B; L1A WITH L1C; L1A WITH L1D; L1B WITH L1D; L1B WITH L1C; L1B WITH L1C; L1D WITH L1E; L1G WITH L1H; L2B WITH L2C; L2B WITH L2G; L2C WITH L2D; L2G WITH L2F; L2G WITH L2H; L3D WITH L3C; L3A WITH L3C; L4A WITH L4B; L5A WITH L5C; L5A WITH L5D; L5B WITH L5C; L5B WITH L5D) |

Table S2. Factors associated with the attitudes about HPV vaccination among teenagers and young adults in Midwest, US, March/April, 2023.

| <b>Exposure</b>                                                              | <b>Mediator</b>                                                   | <b>Outcome</b>                        | <b><math>\beta</math> (95% CI)</b> |
|------------------------------------------------------------------------------|-------------------------------------------------------------------|---------------------------------------|------------------------------------|
| Beliefs about the benefits of vaccination                                    | N.A.                                                              | Perceived benefits of HPV vaccination | 0.07 (-0.13, 0.26)                 |
| Beliefs about barriers to vaccination                                        | N.A.                                                              | Perceived benefits of HPV vaccination | -0.27 (-0.41, -0.13)               |
| Beliefs about susceptibility to HPV infection and cervical cancer            | N.A.                                                              | Perceived benefits of HPV vaccination | <b>0.57 (0.24, 0.90)</b>           |
| Beliefs about severity of HPV infection and cervical cancer                  | N.A.                                                              | Perceived benefits of HPV vaccination | <b>1.14 (0.87, 1.41)</b>           |
| Beliefs about benefits of vaccination                                        | N.A.                                                              | Perceived barriers to HPV vaccination | <b>0.72 (0.25, 1.19)</b>           |
| Beliefs about barriers to vaccination                                        | N.A.                                                              | Perceived barriers to HPV vaccination | <b>1.84 (0.99, 2.69)</b>           |
| Beliefs about susceptibility to HPV infection and cervical cancer            | N.A.                                                              | Perceived barriers to HPV vaccination | -0.03 (-0.29, 0.22)                |
| Beliefs about severity of HPV infection and cervical cancer                  | N.A.                                                              | Perceived barriers to HPV vaccination | <b>-0.26 (-0.40, -0.11)</b>        |
| Knowledge and awareness about HPV infection, cervical cancer and HPV vaccine | Beliefs about benefits of vaccination                             | Perceived benefits of HPV vaccination | 0.05 (-0.09, 0.18)                 |
|                                                                              | Beliefs about barriers of vaccination                             | Perceived benefits of HPV vaccination | <b>0.15 (0.05, 0.25)</b>           |
|                                                                              | Beliefs about susceptibility to HPV infection and cervical cancer | Perceived benefits of HPV vaccination | -0.12 (-0.23, -0.01)               |
|                                                                              | Beliefs about severity of HPV infection and cervical cancer       | Perceived benefits of HPV vaccination | <b>0.83 (0.61, 1.06)</b>           |
| <b>Total</b>                                                                 |                                                                   |                                       | <b>0.91 (0.82, 1.00)</b>           |

|                                                                              |                                                                   |                                       |                             |
|------------------------------------------------------------------------------|-------------------------------------------------------------------|---------------------------------------|-----------------------------|
| Knowledge and awareness about HPV infection, cervical cancer and HPV vaccine | Beliefs about benefits of vaccination                             | Perceived barriers to HPV vaccination | <b>0.50 (0.10, 0.90)</b>    |
|                                                                              | Beliefs about barriers of vaccination                             | Perceived barriers to HPV vaccination | <b>-1.03 (-1.44, -0.61)</b> |
|                                                                              | Beliefs about susceptibility to HPV infection and cervical cancer | Perceived barriers to HPV vaccination | 0.07 (-0.06, 0.07)          |
|                                                                              | Beliefs about severity of HPV infection and cervical cancer       | Perceived barriers to HPV vaccination | <b>-0.19 (-0.31, -0.06)</b> |
| Total                                                                        |                                                                   |                                       | <b>-0.70 (-0.85, -0.56)</b> |
| Age                                                                          | Beliefs about benefits of vaccination                             | Perceived benefits of HPV vaccination | 0.00 (-0.005, 0.006)        |
|                                                                              | Beliefs about barriers to vaccination                             | Perceived benefits of HPV vaccination | -0.005 (-0.02, 0.01)        |
|                                                                              | Beliefs about susceptibility to HPV infection and cervical cancer | Perceived benefits of HPV vaccination | <b>0.06 (0.003, 0.12)</b>   |
|                                                                              | Beliefs about severity of HPV infection and cervical cancer       | Perceived benefits of HPV vaccination | 0.03 (-0.04, 0.11)          |
| Total                                                                        |                                                                   |                                       | <b>0.09 (0.01, 0.17)</b>    |
| Age                                                                          | Beliefs about benefits of vaccination                             | Perceived barriers to HPV vaccination |                             |
|                                                                              | Beliefs about barriers to vaccination                             | Perceived barriers to HPV vaccination | 0.04 (-0.07, 0.14)          |
|                                                                              | Beliefs about susceptibility to HPV infection and cervical cancer | Perceived barriers to HPV vaccination | -0.003 (-0.04, 0.03)        |
|                                                                              | Beliefs about severity of HPV infection and cervical cancer       | Perceived barriers to HPV vaccination | -0.008 (-0.02, 0.01)        |
| Total                                                                        |                                                                   |                                       | 0.03 (-0.05, 0.105)         |

|                    |                                                                   |                                       |                             |
|--------------------|-------------------------------------------------------------------|---------------------------------------|-----------------------------|
| Gender             | Beliefs about benefits of vaccination                             | Perceived benefits of HPV vaccination | 0.004 (-0.01, 0.02)         |
|                    | Beliefs about barriers to vaccination                             | Perceived benefits of HPV vaccination | 0.09 (-0.003, 0.02)         |
|                    | Beliefs about susceptibility to HPV infection and cervical cancer | Perceived benefits of HPV vaccination | -0.03 (-0.07, 0.009)        |
|                    | Beliefs about severity of HPV infection and cervical cancer       | Perceived benefits of HPV vaccination | <b>0.11 (0.05, 0.18)</b>    |
| Total              |                                                                   |                                       | <b>0.09 (0.04, 0.15)</b>    |
| Gender             | Beliefs about benefits of vaccination                             | Perceived barriers to HPV vaccination | 0.05 (0.00, 0.10)           |
|                    | Beliefs about barriers to vaccination                             | Perceived barriers to HPV vaccination | -0.06 (-0.13, 0.01)         |
|                    | Beliefs about susceptibility to HPV infection and cervical cancer | Perceived barriers to HPV vaccination | 0.002 (-0.01, 0.02)         |
|                    | Beliefs about severity of HPV infection and cervical cancer       | Perceived barriers to HPV vaccination | <b>-0.03 (-0.04, -0.01)</b> |
| Total              |                                                                   |                                       | -0.04 (-0.09, 0.02)         |
| Educational status | Beliefs about benefits of vaccination                             | Perceived benefits of HPV vaccination | -0.003 (-0.01, 0.01)        |
|                    | Beliefs about barriers to vaccination                             | Perceived benefits of HPV vaccination | -0.011 (-0.03, 0.005)       |
|                    | Beliefs about susceptibility to HPV infection and cervical cancer | Perceived benefits of HPV vaccination | 0.04 (-0.07, 0.09)          |
|                    | Beliefs about severity of HPV infection and cervical cancer       | Perceived benefits of HPV vaccination | -0.01 (-0.09, 0.07)         |
| Total              |                                                                   |                                       | 0.02 (-0.06, 0.10)          |
| Educational status | Beliefs about benefits of vaccination                             | Perceived barriers to HPV vaccination | -0.03 (-0.09, 0.03)         |

|           |                                                                   |                                       |                           |
|-----------|-------------------------------------------------------------------|---------------------------------------|---------------------------|
|           | Beliefs about barriers to vaccination                             | Perceived barriers to HPV vaccination | 0.08 (-0.03, 0.18)        |
|           | Beliefs about susceptibility to HPV infection and cervical cancer | Perceived barriers to HPV vaccination | -0.002 (-0.02, 0.02)      |
|           | Beliefs about severity of HPV infection and cervical cancer       | Perceived barriers to HPV vaccination | 0.002 (-0.01, 0.02)       |
| Total     |                                                                   |                                       | 0.05 (-0.03, 0.13)        |
| Ethnicity | Beliefs about benefits of vaccination                             | Perceived benefits of HPV vaccination | -0.001 (-0.005, 0.003)    |
|           | Beliefs about barriers to vaccination                             | Perceived benefits of HPV vaccination | -0.008 (-0.02, 0.002)     |
|           | Beliefs about susceptibility to HPV infection and cervical cancer | Perceived benefits of HPV vaccination | 0.01 (-0.02, 0.04)        |
|           | Beliefs about severity of HPV infection and cervical cancer       | Perceived benefits of HPV vaccination | -0.049 (-0.10, 0.001)     |
| Total     |                                                                   |                                       | -0.05 (-0.11, 0.008)      |
| Ethnicity | Beliefs about benefits of vaccination                             | Perceived barriers to HPV vaccination | -0.001 (-0.005, 0.004)    |
|           | Beliefs about barriers to vaccination                             | Perceived barriers to HPV vaccination | -0.008 (-0.02, 0.004)     |
|           | Beliefs about susceptibility to HPV infection and cervical cancer | Perceived barriers to HPV vaccination | 0.008 (-0.03, 0.04)       |
|           | Beliefs about severity of HPV infection and cervical cancer       | Perceived barriers to HPV vaccination | -0.05 (-0.11, 0.008)      |
| Total     |                                                                   |                                       | <b>0.06 (0.001, 0.10)</b> |
